# Supplementary material
Source: publisher site journal article supplement (https://www.dovepress.com/article/537967)
Supplement: Supplementary file 1 [file 537967%20Revised%20%252509Supplementary%20material.docx]

**Supplementary Table 1 The detail information for all primers used**

**in current study**

| **Gene** | **Primer sequence**  **(5’ - 3’)** | **Product size**  **(bp)** | **Annealing temperature**  **(℃)** | **Reference sequence (NCBI)** |
| --- | --- | --- | --- | --- |
| **ST8SIA1** | F: CAG GAC TTC AAG GGC TAC CT | 180 | 60 | NM_015277.4 |
| R: GTC TTG GCA TCT TGG TCT TG |
| **FCN3** | F: TGG AAG GCT GGA AGA AGA AC | 150 | 60 | NM_000014.6 |
| R: CCA GGT GGT GGT GAA GAT GT |
| **SULF1** | F: AAG GCT GGA GGA GGA GAT GA | 200 | 60 | NM_015170.4 |
| R: TCC TGG TGG TGG TGA AGA AG |
| **GAPDH** | F: GGAGCGAGATCCCTCCAAAAT | 197 | 60 | NM_002046.7 |
| R: GGCTGTTGTCATACTTCTCATGG |


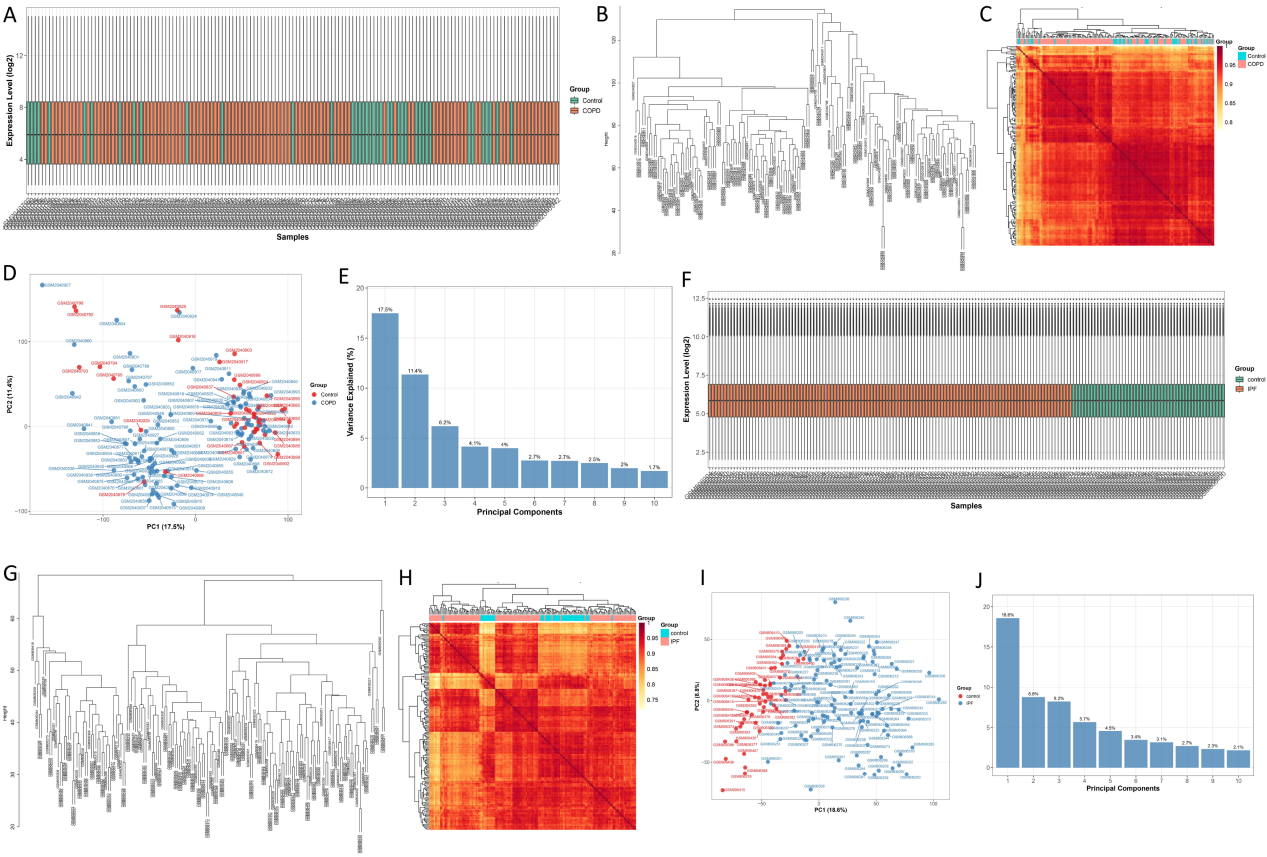


**Supplementary Figure 1 Quality control of training sets GSE76925 and GSE32537.**

A-E, Sample expression distribution (A), hierarchical clustering of samples (B), sample correlation heatmap (C), principal component analysis (PCA) plot (D), and explained variance of PCA (E) in the GSE76925 dataset. F-J, Sample expression distribution (F), hierarchical clustering of samples (G), sample correlation heatmap (H), PCA plot (I), and explained variance of PCA (J) in the GSE32537 dataset.


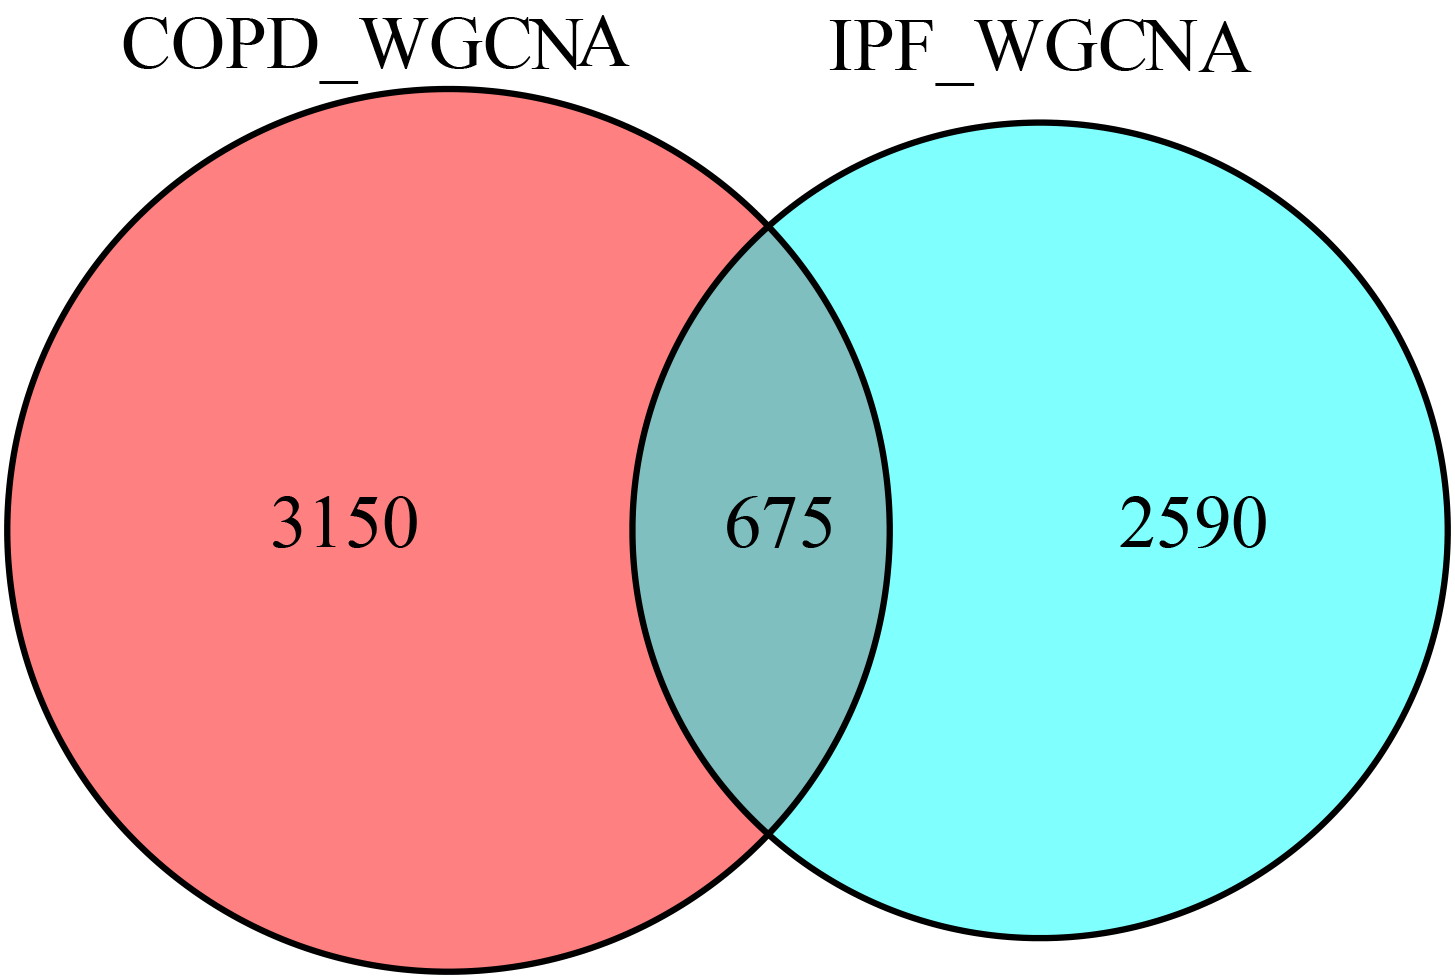


**Supplementary Figure 2 The VENN plot analysis revealed common genes between COPD module genes and IPF module genes.**


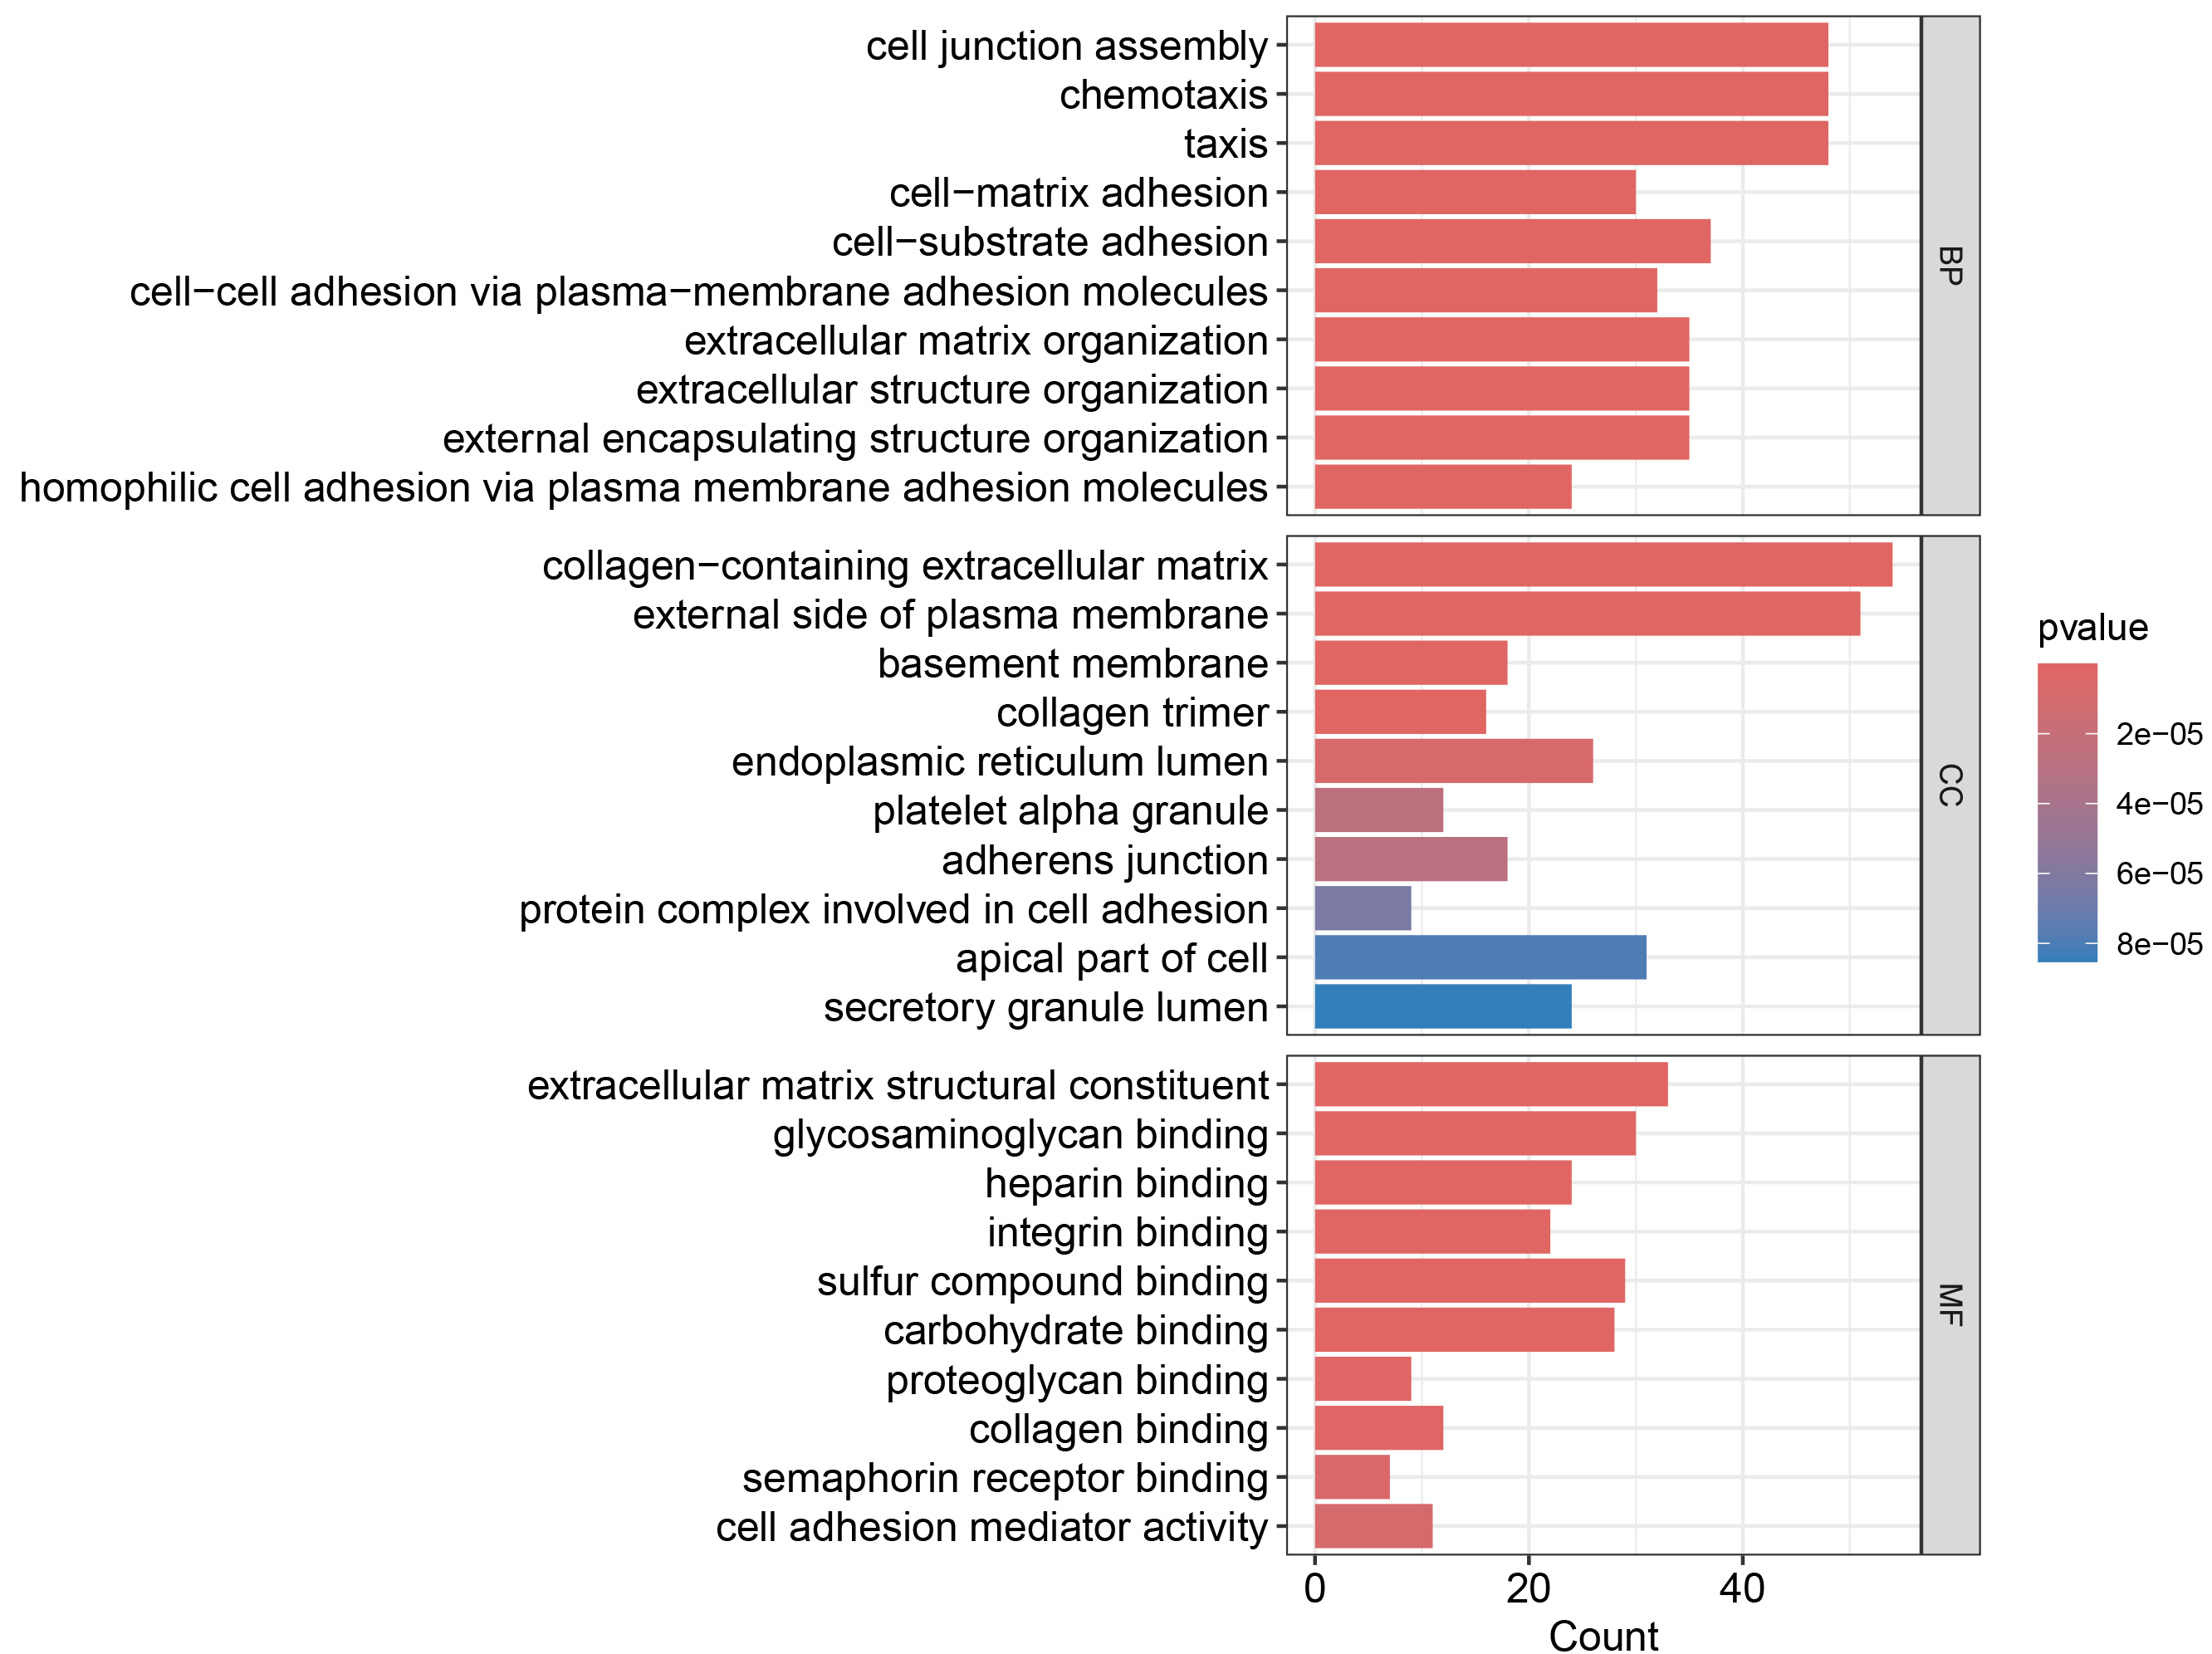


**Supplementary Figure 3 The significant GO-BP, GO-CC and GO-MF functions assembled by module genes.**

**
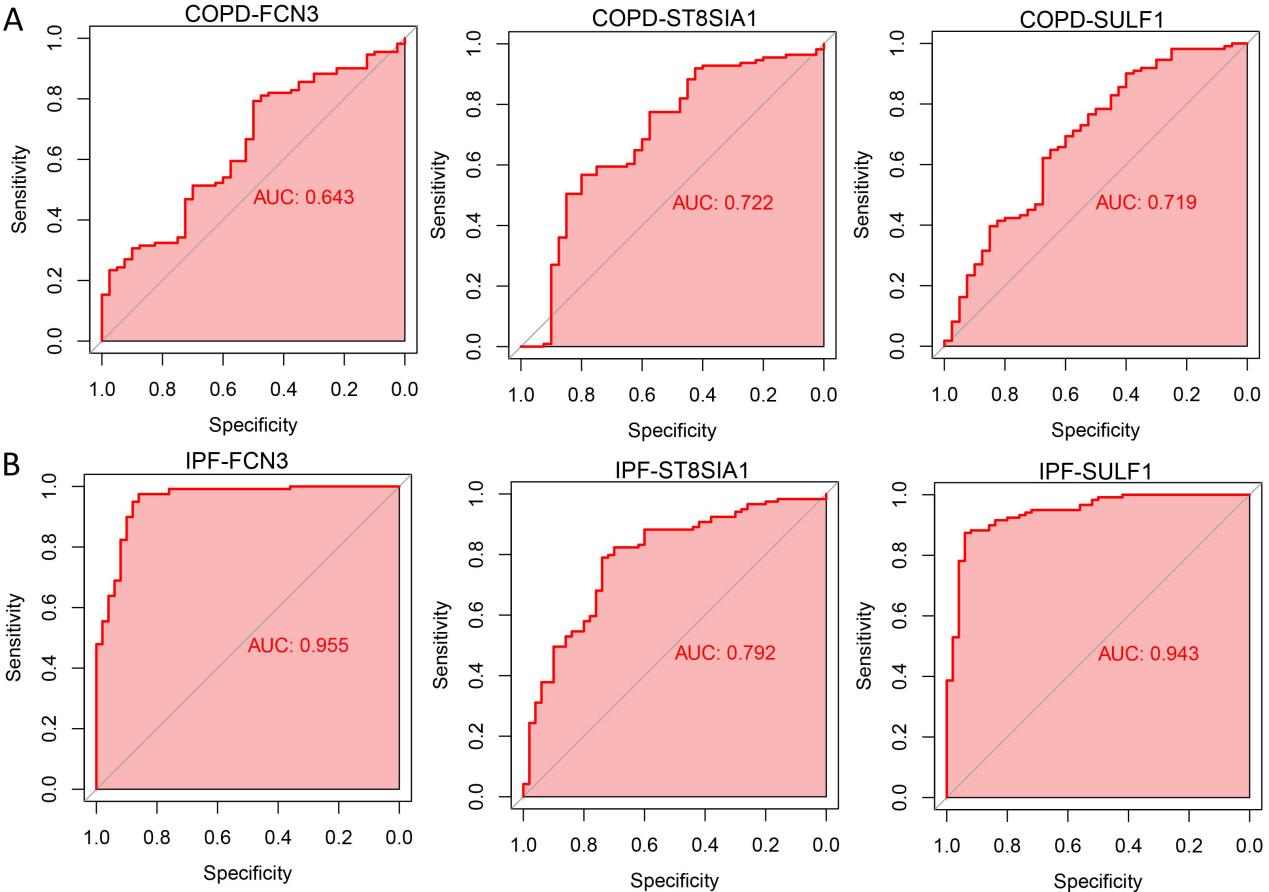
**

**Supplementary Figure 4 ROC curves of characteristic genes.** A, ROC curves of SULF1, ST8SIA1, and FCN3 in GSE76925 (COPD). B, ROC curves of SULF1, ST8SIA1, and FCN3 in GSE32537 (IPF).
